# Supplementary material for: Acute effects of a commercially-available pre-workout supplement on markers of training: a double-blind study
Source: Springer Nature journal article supplement (doi:10.1186/s12970-014-0040-0), 2014-08-14
Supplement: MOESM5 [file 9768040]

Table 2:

|                 | SUP              | PLC              |
|-----------------|------------------|------------------|
| Total Calories  | 2320.71 ± 664.44 | 2352.75 ± 570.37 |
| CHO (grams)     | 259.92 ± 87.25   | 271.90 ± 66.58   |
| Fat (grams)     | 91.02 ± 30.01    | 99.95 ± 40.39    |
| Protein (grams) | 105.78 ± 28.45   | 108.05 ± 31.42   |
