# Supplementary figures and images for: Acute effects of a commercially-available pre-workout supplement on markers of training: a double-blind study
Source: Springer Nature journal article supplement (doi:10.1186/s12970-014-0040-0), 2014-08-14

# $\Delta$ Wingate Performance

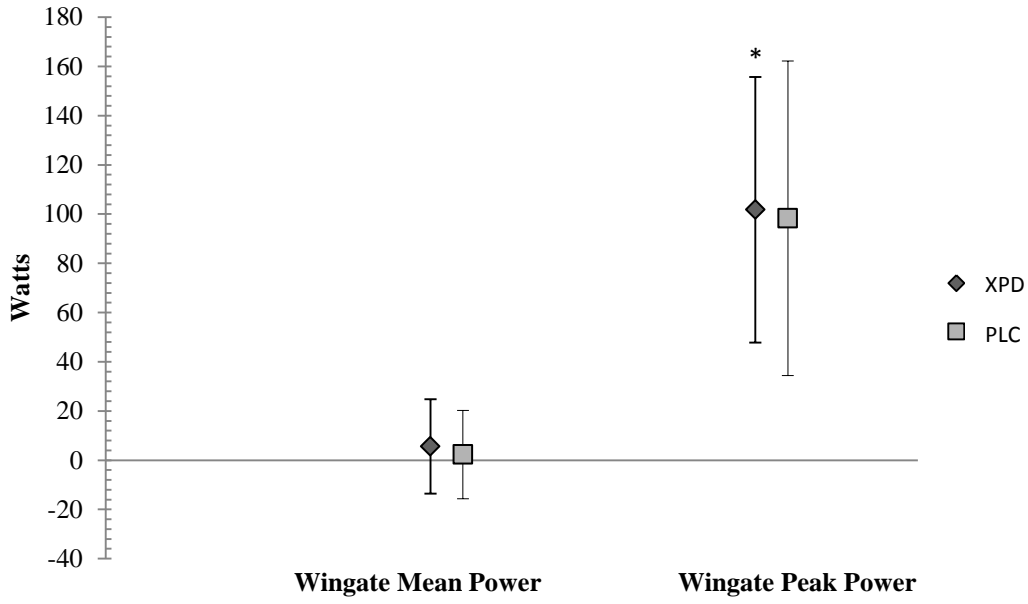

Supplement: MOESM4 [file 9768040]
